# Supplementary material
Source: ML conference proceedings conference paper supplement (https://openaccess.thecvf.com/content/ICCV2021/html/Ardino_Click_To_Move_ICCV_2021_paper.html)
Supplement: Supplementary file 2 [file Ardino_Click_To_Move_ICCV_2021_supplemental.zip]

Archive with 53 entries (42 files):
- images/
- images/0/
- images/0/baseline.gif
- images/0/baseline1.gif
- images/0/baseline2.gif
- images/0/c2m.gif
- images/1/
- images/1/baseline.gif
- images/1/baseline1.gif
- images/1/baseline2.gif
- images/1/c2m.gif
- images/2/
- images/2/baseline.gif
- images/2/baseline1.gif
- images/2/baseline2.gif
- images/2/c2m.gif
- images/3/
- images/3/baseline.gif
- images/3/baseline1.gif
- images/3/baseline2.gif
- images/3/c2m.gif
- images/4/
- images/4/baseline.gif
- images/4/baseline1.gif
- images/4/baseline2.gif
- images/4/c2m.gif
- images/5/
- images/5/baseline.gif
- images/5/baseline1.gif
- images/5/baseline2.gif
- images/5/c2m.gif
- images/6/
- images/6/baseline.gif
- images/6/baseline1.gif
- images/6/baseline2.gif
- images/6/c2m.gif
- images/7/
- images/7/baseline.gif
- images/7/baseline1.gif
- images/7/baseline2.gif
- images/7/c2m.gif
- images/8/
- images/8/baseline.gif
- images/8/baseline1.gif
- images/8/baseline2.gif
- images/8/c2m.gif
- images/9/
- images/9/baseline.gif
- images/9/baseline1.gif
- images/9/baseline2.gif
- images/9/c2m.gif
- paper_C2M_supplementary.pdf
- video.html
