# Supplementary material
Source: ML conference proceedings conference paper supplement (https://openaccess.thecvf.com/content/ICCV2021/html/Ardino_Click_To_Move_ICCV_2021_paper.html)

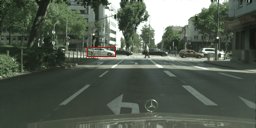

Supplement: Supplementary file 2 [file Ardino_Click_To_Move_ICCV_2021_supplemental.zip › images/0/baseline.gif]

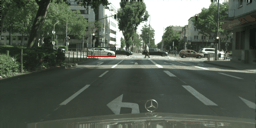

Supplement: Supplementary file 2 [file Ardino_Click_To_Move_ICCV_2021_supplemental.zip › images/0/baseline1.gif]

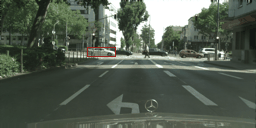

Supplement: Supplementary file 2 [file Ardino_Click_To_Move_ICCV_2021_supplemental.zip › images/0/baseline2.gif]

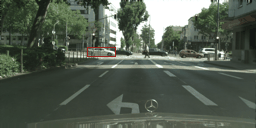

Supplement: Supplementary file 2 [file Ardino_Click_To_Move_ICCV_2021_supplemental.zip › images/0/c2m.gif]

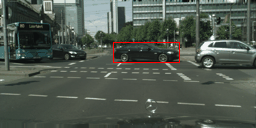

Supplement: Supplementary file 2 [file Ardino_Click_To_Move_ICCV_2021_supplemental.zip › images/1/baseline.gif]

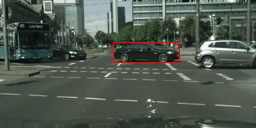

Supplement: Supplementary file 2 [file Ardino_Click_To_Move_ICCV_2021_supplemental.zip › images/1/baseline1.gif]

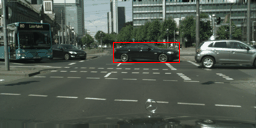

Supplement: Supplementary file 2 [file Ardino_Click_To_Move_ICCV_2021_supplemental.zip › images/1/baseline2.gif]

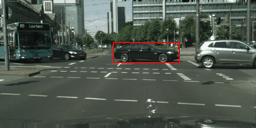

Supplement: Supplementary file 2 [file Ardino_Click_To_Move_ICCV_2021_supplemental.zip › images/1/c2m.gif]

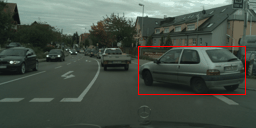

Supplement: Supplementary file 2 [file Ardino_Click_To_Move_ICCV_2021_supplemental.zip › images/2/baseline.gif]

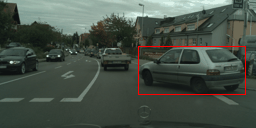

Supplement: Supplementary file 2 [file Ardino_Click_To_Move_ICCV_2021_supplemental.zip › images/2/baseline1.gif]

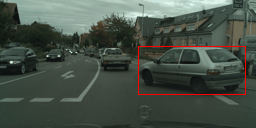

Supplement: Supplementary file 2 [file Ardino_Click_To_Move_ICCV_2021_supplemental.zip › images/2/baseline2.gif]

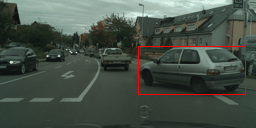

Supplement: Supplementary file 2 [file Ardino_Click_To_Move_ICCV_2021_supplemental.zip › images/2/c2m.gif]

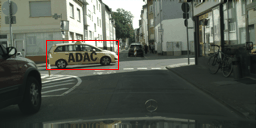

Supplement: Supplementary file 2 [file Ardino_Click_To_Move_ICCV_2021_supplemental.zip › images/3/baseline.gif]

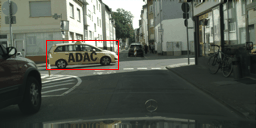

Supplement: Supplementary file 2 [file Ardino_Click_To_Move_ICCV_2021_supplemental.zip › images/3/baseline1.gif]

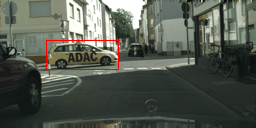

Supplement: Supplementary file 2 [file Ardino_Click_To_Move_ICCV_2021_supplemental.zip › images/3/baseline2.gif]

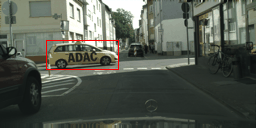

Supplement: Supplementary file 2 [file Ardino_Click_To_Move_ICCV_2021_supplemental.zip › images/3/c2m.gif]

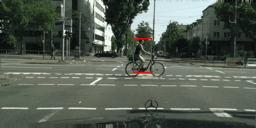

Supplement: Supplementary file 2 [file Ardino_Click_To_Move_ICCV_2021_supplemental.zip › images/4/baseline.gif]

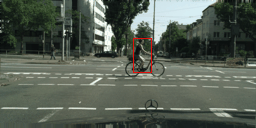

Supplement: Supplementary file 2 [file Ardino_Click_To_Move_ICCV_2021_supplemental.zip › images/4/baseline1.gif]

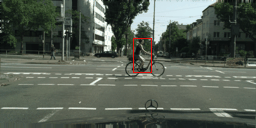

Supplement: Supplementary file 2 [file Ardino_Click_To_Move_ICCV_2021_supplemental.zip › images/4/baseline2.gif]

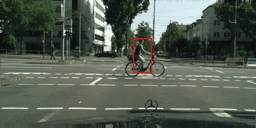

Supplement: Supplementary file 2 [file Ardino_Click_To_Move_ICCV_2021_supplemental.zip › images/4/c2m.gif]

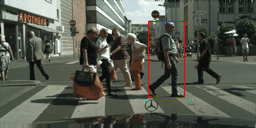

Supplement: Supplementary file 2 [file Ardino_Click_To_Move_ICCV_2021_supplemental.zip › images/5/baseline.gif]

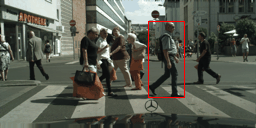

Supplement: Supplementary file 2 [file Ardino_Click_To_Move_ICCV_2021_supplemental.zip › images/5/baseline1.gif]

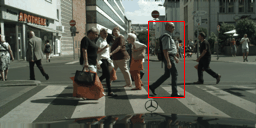

Supplement: Supplementary file 2 [file Ardino_Click_To_Move_ICCV_2021_supplemental.zip › images/5/baseline2.gif]

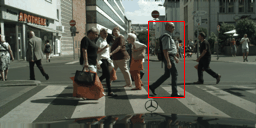

Supplement: Supplementary file 2 [file Ardino_Click_To_Move_ICCV_2021_supplemental.zip › images/5/c2m.gif]

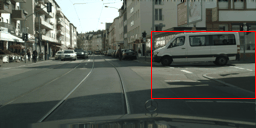

Supplement: Supplementary file 2 [file Ardino_Click_To_Move_ICCV_2021_supplemental.zip › images/6/baseline.gif]

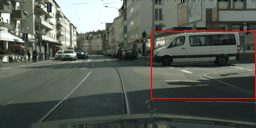

Supplement: Supplementary file 2 [file Ardino_Click_To_Move_ICCV_2021_supplemental.zip › images/6/baseline1.gif]

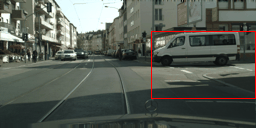

Supplement: Supplementary file 2 [file Ardino_Click_To_Move_ICCV_2021_supplemental.zip › images/6/baseline2.gif]

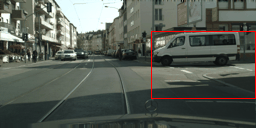

Supplement: Supplementary file 2 [file Ardino_Click_To_Move_ICCV_2021_supplemental.zip › images/6/c2m.gif]

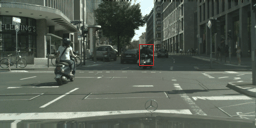

Supplement: Supplementary file 2 [file Ardino_Click_To_Move_ICCV_2021_supplemental.zip › images/7/baseline.gif]

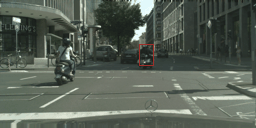

Supplement: Supplementary file 2 [file Ardino_Click_To_Move_ICCV_2021_supplemental.zip › images/7/baseline1.gif]

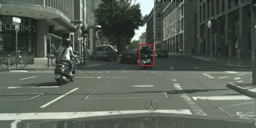

Supplement: Supplementary file 2 [file Ardino_Click_To_Move_ICCV_2021_supplemental.zip › images/7/baseline2.gif]

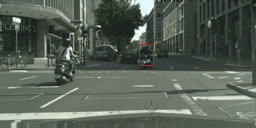

Supplement: Supplementary file 2 [file Ardino_Click_To_Move_ICCV_2021_supplemental.zip › images/7/c2m.gif]

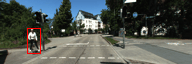

Supplement: Supplementary file 2 [file Ardino_Click_To_Move_ICCV_2021_supplemental.zip › images/8/baseline.gif]

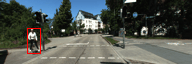

Supplement: Supplementary file 2 [file Ardino_Click_To_Move_ICCV_2021_supplemental.zip › images/8/baseline1.gif]

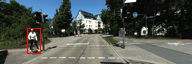

Supplement: Supplementary file 2 [file Ardino_Click_To_Move_ICCV_2021_supplemental.zip › images/8/baseline2.gif]

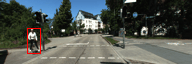

Supplement: Supplementary file 2 [file Ardino_Click_To_Move_ICCV_2021_supplemental.zip › images/8/c2m.gif]

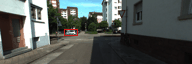

Supplement: Supplementary file 2 [file Ardino_Click_To_Move_ICCV_2021_supplemental.zip › images/9/baseline.gif]

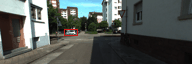

Supplement: Supplementary file 2 [file Ardino_Click_To_Move_ICCV_2021_supplemental.zip › images/9/baseline1.gif]

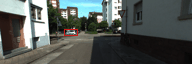

Supplement: Supplementary file 2 [file Ardino_Click_To_Move_ICCV_2021_supplemental.zip › images/9/baseline2.gif]

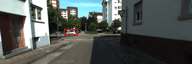

Supplement: Supplementary file 2 [file Ardino_Click_To_Move_ICCV_2021_supplemental.zip › images/9/c2m.gif]
